# Supplementary material for: An energy efficient bi-functional electrode for continuous cation-selective capacitive deionization
Source: Royal Society of Chemistry journal article supplement (doi:10.1039/d0nr05826b), 2020-01-01
Supplement: d0nr05826b1.pdf [file d0nr05826b1.pdf]

## Supporting Information

### Energy Efficient Bi-Functional Electrode for Continuous Cation-Selective Capacitive Deionization

*Sareh Vafakhah, Mohsen Saeedikhani, Mohammad Tanhaei, Shaozhuan Huang, Lu Guo, Sing Yang Chiam, and Hui Ying Yang\**

\*E-mail: yanghuiying@sutd.edu.sg

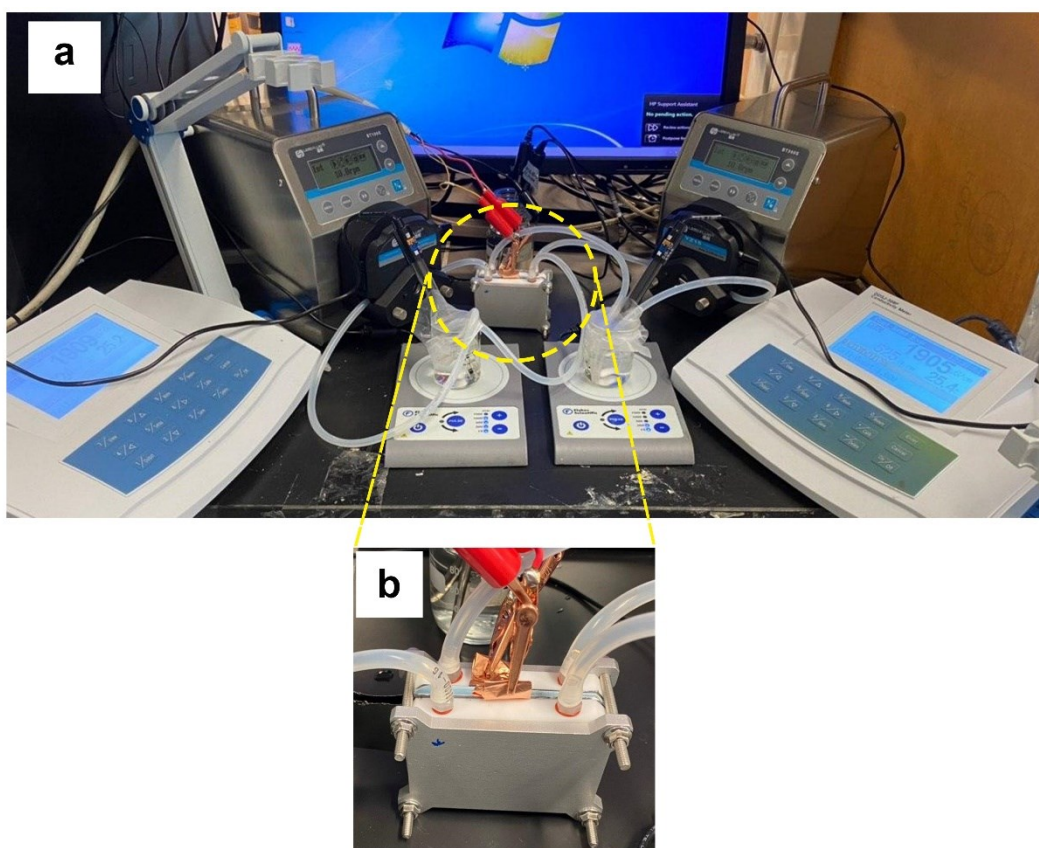

**Figure S1**, a) The photograph of full cation-selective CDI set-up. b) the desalination cell.

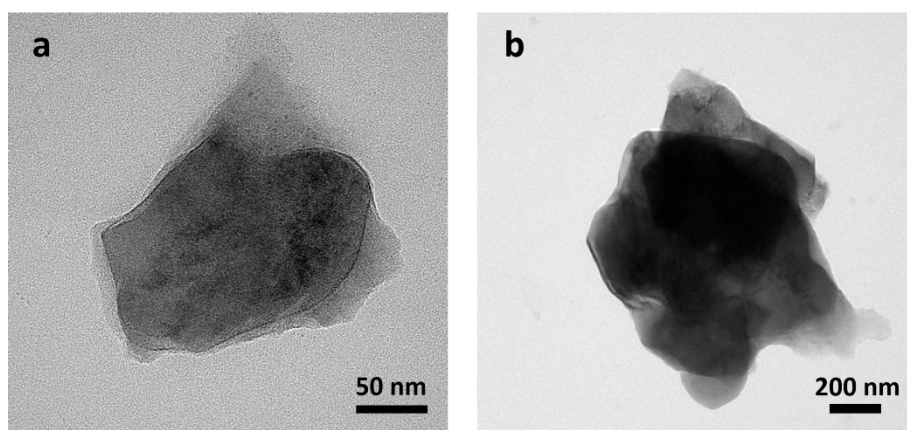

**Figure S2**, (a) and (b) the TEM images  $\text{Na}_2\text{VTi}(\text{PO}_4)_3 @ \text{C}$  revealing the average size of particles coated with the amorphous carbon layer.

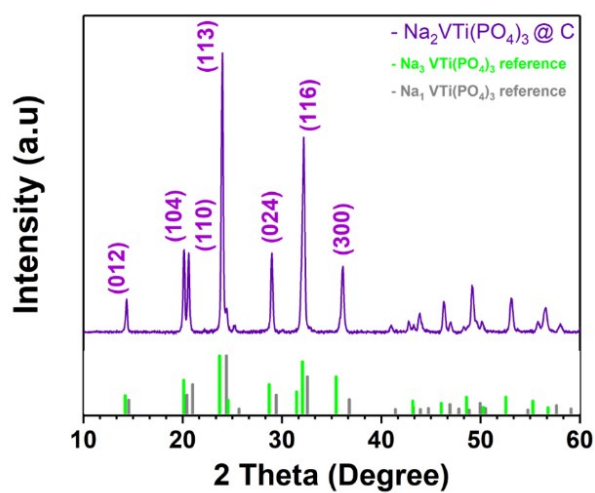

**Figure S3**, The X-ray diffraction patterns for  $\text{Na}_2\text{VTi}(\text{PO}_4)_3 @ \text{C}$ , and two reference patterns of  $\text{NaVTi}(\text{PO}_4)_3$  (PDF#00-049-1114) and  $\text{Na}_3\text{VTi}(\text{PO}_4)_3$  (PDF#00-049-1109).

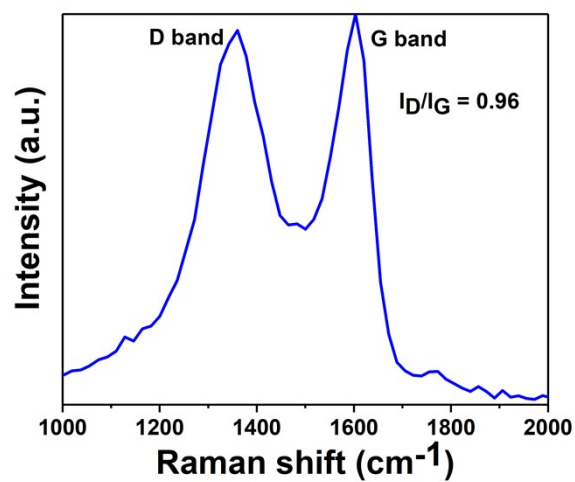

Figure S4, Raman spectrum for Na<sub>2</sub>VTi(PO<sub>4</sub>)<sub>3</sub> @ carbon.

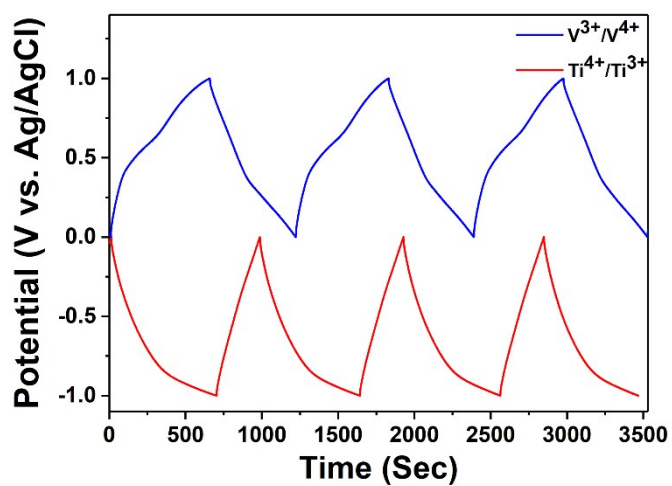

Figure S5, The Galvanostatic Charge Discharge (GCD) results for cathode and anode voltage window at the current density of 0.2 A g<sup>-1</sup>.

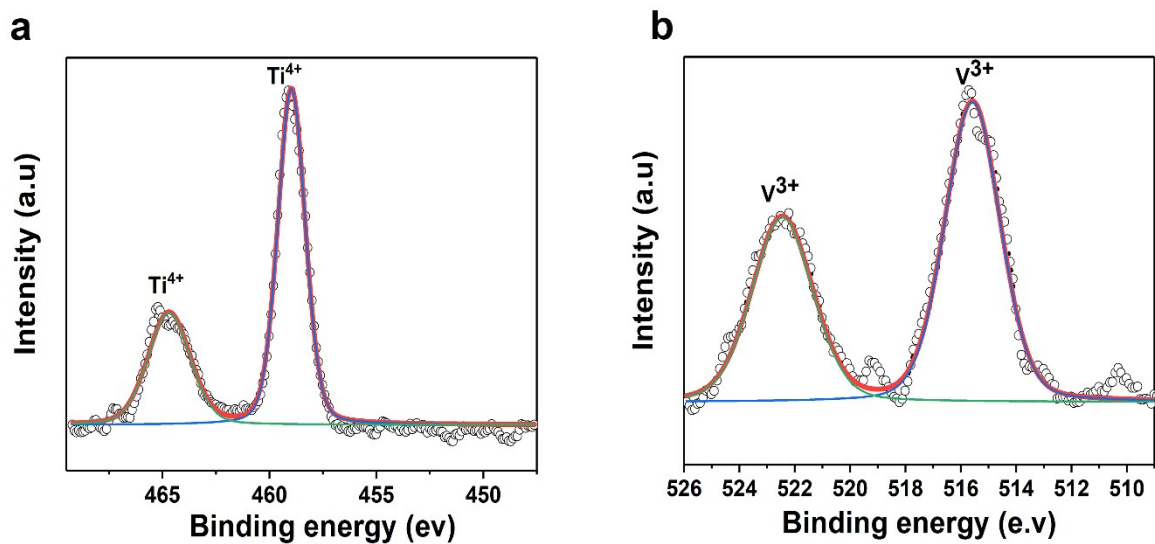

**Figure S6**, , XPS spectra of a) Titanium element in cathode after charging to 1 V (vs. Ag/AgCl).  
 b) Vanadium element in anode after charging to -1 V (vs. Ag/AgCl).

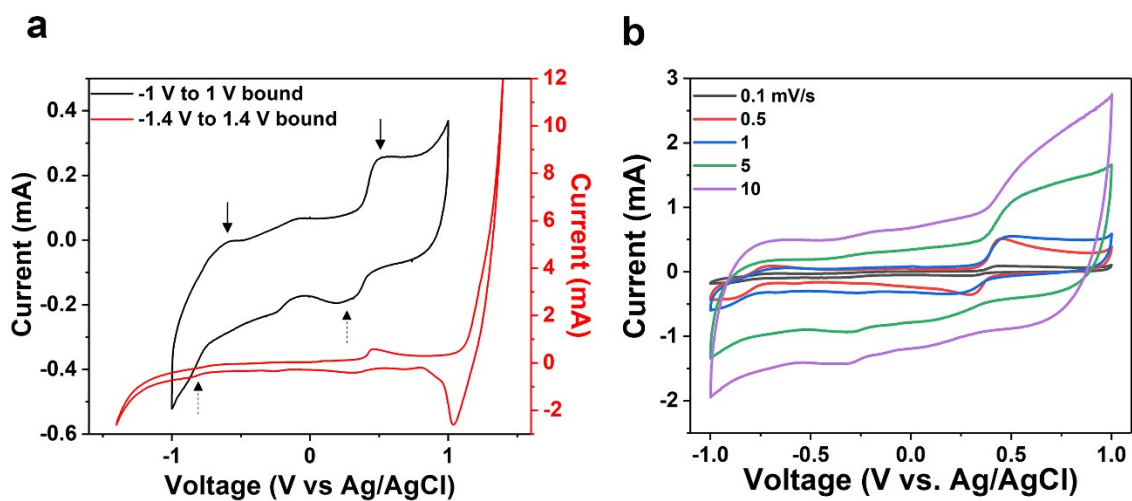

**Figure S7**, The CV experiment for two voltage window range of -1 V to 1 V and -1.4 V to 1.4 V.
